# Supplementary material
Source: Springer Nature journal article supplement (https://www.springermedizin.de/resource/supplementary/12891_2010_980_MOESM4_ESM.pdf/9506846)

Women

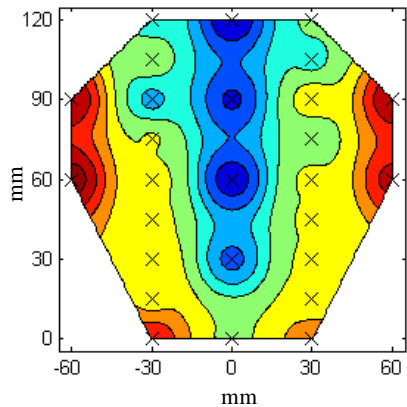

Men

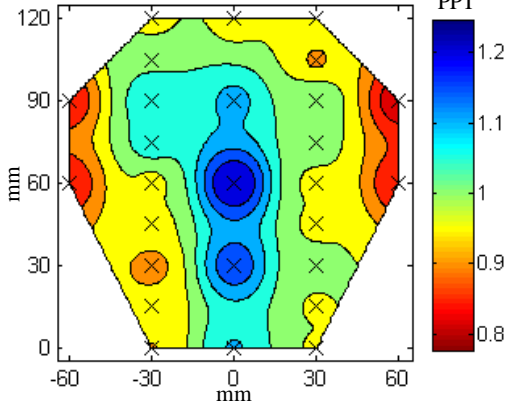

Supplement: MOESM4 [file 9506846]
